# Supplementary material for: A machine-learning model for reducing misdiagnosis in heparin-induced thrombocytopenia: A prospective, multicenter, observational study
Source: PubMed Central journal article supplement (PMC9706528; doi:10.1016/j.eclinm.2022.101745), 2022-11-24
Supplement: mmc1.pdf [file mmc1.pdf]

## Table of contents

|                                                                                                                                                                        |    |
|------------------------------------------------------------------------------------------------------------------------------------------------------------------------|----|
| Graphical abstract .....                                                                                                                                               | 1  |
| Sample size calculations .....                                                                                                                                         | 2  |
| Table S1: Inclusion of patients in 11 study centers .....                                                                                                              | 3  |
| Figure S1: Currently recommended clinical algorithm .....                                                                                                              | 4  |
| Table S2: Backward elimination for predictor selection: multivariate logistic regression analysis.....                                                                 | 5  |
| Table S3: Discordant results between the 4T Score, immunoassays and the HIPA. ....                                                                                     | 6  |
| Figure S2: Distribution of minimal depth and its mean (predictor selection) .....                                                                                      | 7  |
| Figure S3: Multi-way importance plot (Mean depth of first split, number of trees in which the root is split on the variable, total number of nodes in the forest)..... | 8  |
| Figure S4: Multi-way importance plot (Accuracy decrease, Gini decrease, p-value) .....                                                                                 | 9  |
| Table S4: Logarithmic loss scores of the different models .....                                                                                                        | 10 |
| Table S5: ROC-Curves of the different models .....                                                                                                                     | 11 |
| Table S6: Sensitivity analysis based on 250 trainings and validation splits .....                                                                                      | 12 |
| Table S7: Intercept and coefficients of the logistic regression models .....                                                                                           | 13 |
| Table S8: Diagnostic accuracy of a multivariable diagnostic prediction model for HIT as determined in the full cohort.....                                             | 14 |
| Table S9: Statistical test between the TORADI-HIT model and the currently recommended clinical algorithm according to the method of Roldán-Nofuentes .....             | 15 |
| Table S10: Codebook.....                                                                                                                                               | 16 |

Graphical abstract

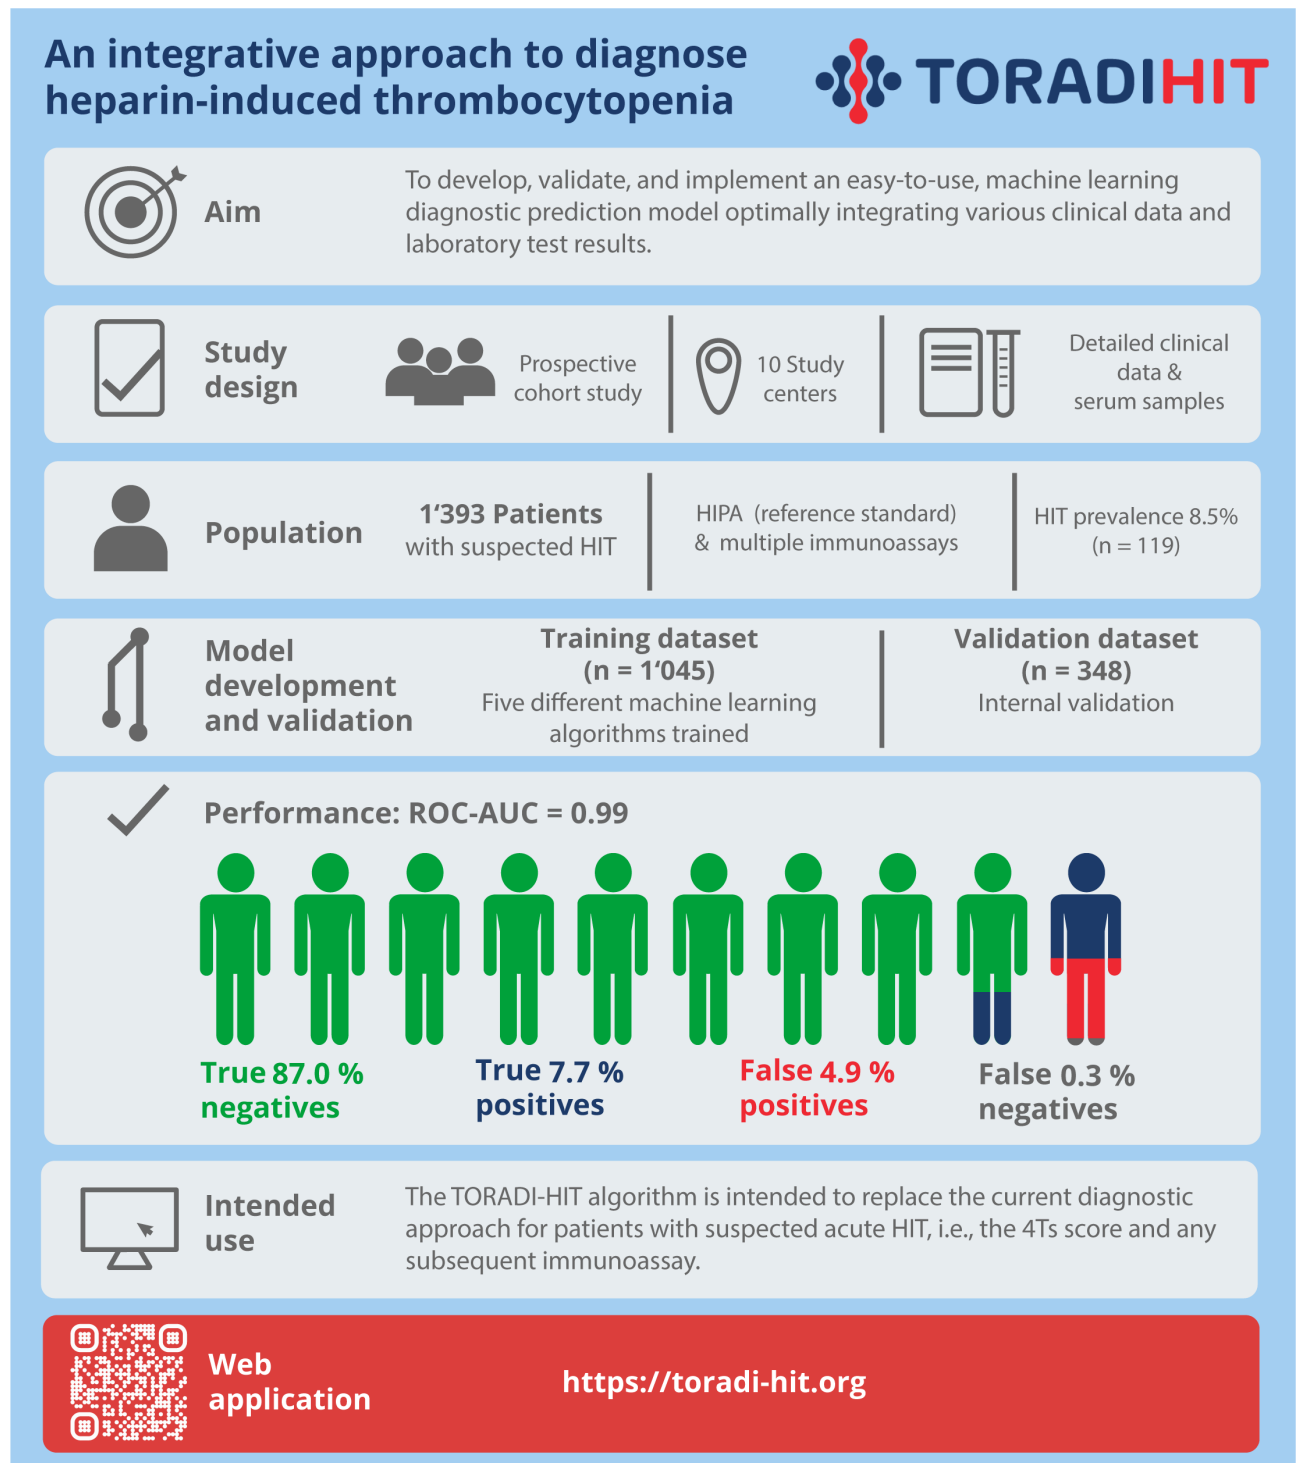

<https://toradi-hit.org>

### Sample size calculations

- 1.) Minimal sample size to achieve an outcome proportion with sufficient precision ( $\sigma = 0.05$ )

$$n = \left(\frac{1.96}{\sigma}\right)^2 * \varphi * (1 - \varphi) = \left(\frac{1.96}{0.05}\right)^2 * 0.085 * (1 - 0.085) = 119.51$$

- 2.) Target sample size and events per predictor to have a mean absolute prediction error of 0.05 was calculated using the calculator provided by van Smeden et al. The number of candidate predictors was set to 6 and the events fraction to 0.1. The minimally required sample size was 370 and the minimally required events per predictor were 6.1.

- 3.) Minimal sample size to achieve a shrinkage factor of 0.9

$$n = \frac{P}{(S - 1) * \ln\left(1 - \frac{R^2 c S}{S}\right)} = \frac{6}{(0.9 - 1) * \ln\left(1 - \frac{0.1}{0.9}\right)} = 509.41$$

- 4.) Minimal sample size to achieve a small optimism of 0.05 in the apparent  $R^2$ . With a estimated  $R^2$  of 0.1.

$$S = \frac{0.1}{0.1 + 0.05 * 0.33} = 0.86$$

$$n = \frac{P}{(S - 1) * \ln\left(1 - \frac{R^2 c S}{S}\right)} = \frac{6}{(0.86 - 1) * \ln\left(1 - \frac{0.1}{0.86}\right)} = 346.7$$

**Table S1: Inclusion of patients in 11 study centers**

| <b>Institutions</b>                   | <b>Type of institution</b> | <b>Location</b>         | <b>Number of patients</b> |
|---------------------------------------|----------------------------|-------------------------|---------------------------|
| Inselspital, Bern University Hospital | University hospital        | Bern, Switzerland       | 665                       |
| University Hospital Zürich            | University hospital        | Zürich, Switzerland     | 524                       |
| University Hospital Basel             | University hospital        | Basel, Switzerland      | 119                       |
| City Hospital Triemli                 | Tertiary teaching hospital | Zürich, Switzerland     | 26                        |
| University Hospital Tübingen          | University hospital        | Tübingen, Germany       | 25                        |
| Cantonal Hospital Aarau               | Tertiary teaching hospital | Aarau, Switzerland      | 24                        |
| University Hospital Greifswald        | University hospital        | Greifswald, Germany     | 23                        |
| Cantonal Hospital Lucerne             | Tertiary teaching hospital | Lucerne, Switzerland    | 17                        |
| Ente Ospedaliero Cantonale (EOC)      | Tertiary teaching hospital | Bellinzona, Switzerland | 16                        |
| Mayo Clinic Florida                   | Tertiary teaching hospital | Jacksonville, FL, USA   | 6                         |
| Cantonal Hospital St. Gallen          | Tertiary teaching hospital | St. Gallen, Switzerland | 3                         |

Figure S1: Currently recommended clinical algorithm

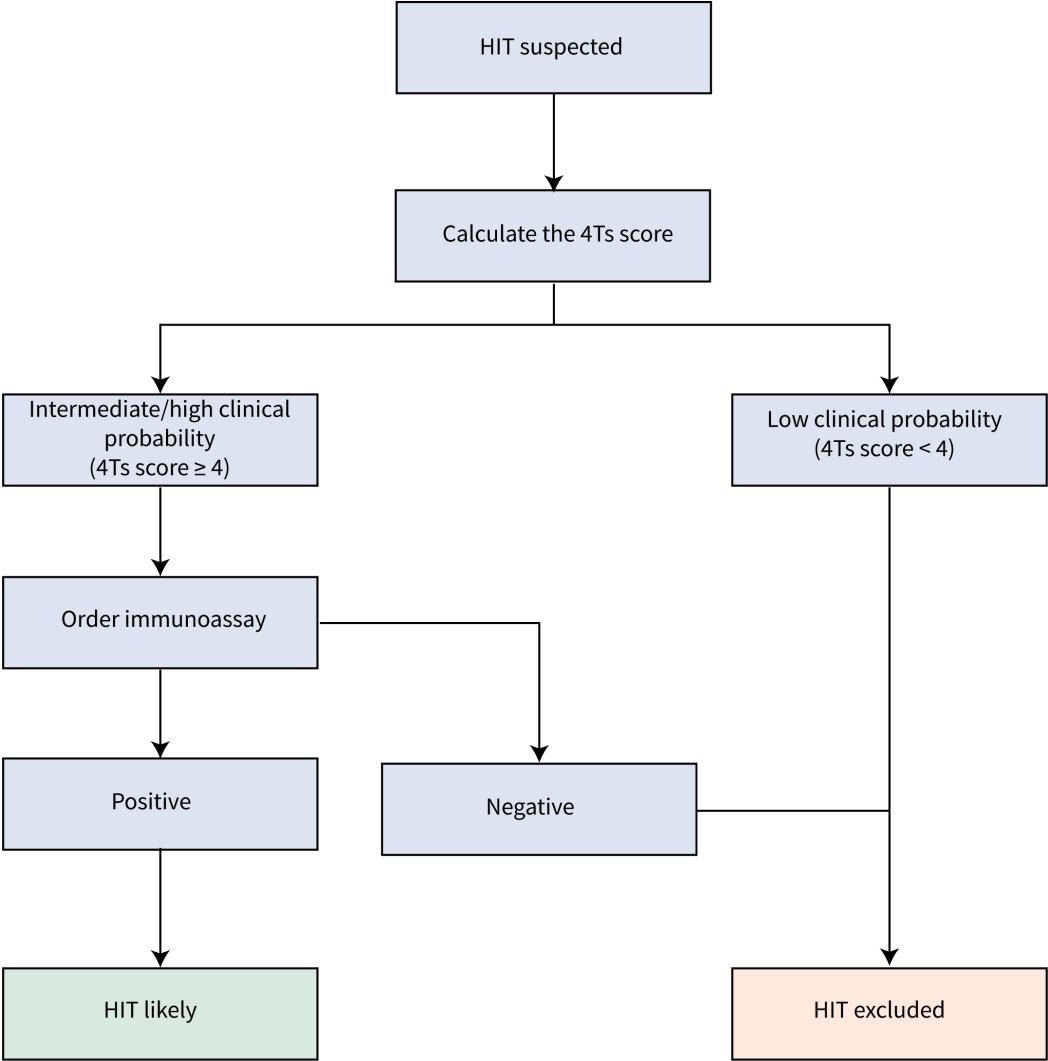

Adapted from: Cuker A, Arepally GM, Chong BH, Cines DB, Greinacher A, Gruel Y, et al. American Society of Hematology 2018 guidelines for management of venous thromboembolism: heparin-induced thrombocytopenia. *Blood Advances* 2018;2:3360–92. <https://doi.org/10.1182/bloodadvances.2018024489>.

**Table S2: Backward elimination for predictor selection: multivariate logistic regression analysis**

| <b>Variables</b>                              | <b>Estimate</b> | <b>Std. Error</b> | <b>p-value</b> |
|-----------------------------------------------|-----------------|-------------------|----------------|
| Setting                                       |                 |                   |                |
| Post-Op general surgery of orthopedic surgery | 0.203204        | 0.735915          | 0.78           |
| Post-OP cardiovascular Internal medicine      | -0.407209       | 0.853488          | 0.63           |
| ICU                                           | -1.064315       | 0.773523          | 0.17           |
| Major Trauma                                  | 3.608439        | 1.701386          | 0.03           |
| Other                                         | -3.172307       | 4.760419          | 0.51           |
| Degree of thrombocytopenia                    | 0.631000        | 0.410318          | 0.12           |
| Timing of thrombocytopenia                    | 1.135267        | 0.320471          | <0.001         |
| Presence of thrombosis                        | 1.019665        | 0.231622          | <0.001         |
| Possible other causes of thrombocytopenia     | 1.610331        | 0.348076          | <0.001         |
| Treatment known to cause thrombocytopenia     | -1.793154       | 1.047000          | 0.09           |
| Unfractionated heparin use                    | 2.433287        | 0.991860          | 0.01           |
| DOAC                                          | 0.697110        | 0.475644          | 0.14           |
| Prior heparin exposure                        | -0.649232       | 0.397215          | 0.10           |
| Leukocyte count                               | 0.049391        | 0.018280          | 0.01           |
| Platelet nadir                                | -0.016277       | 0.005007          | <0.001         |
| C-reactive protein                            | -0.006710       | 0.002353          | <0.001         |
| CLIA                                          | 0.365362        | 0.049454          | <0.001         |

**Table S3: Discordant results between the 4T Score, immunoassays and the HIPA.**

| Immunoassay | Test –<br>HIPA +<br>N (% of HIPA positive*) | Test +<br>HIPA –<br>N (% of HIPA negative*) |
|-------------|---------------------------------------------|---------------------------------------------|
| CLIA        | 5 (4.50 %)                                  | 67 (5.55 %)                                 |
| PaGIA       | 1 (1.01 %)                                  | 200 (17.03 %)                               |
| ELISA       | 3 (2.60 %)                                  | 132 (10.45 %)                               |
| 4Ts Score†  | 10 (8.40 %)                                 | 227 (17.82%)                                |

\*Only patients with a result for the specific immunoassay were considered for the calculation of the percentages

† A 4Ts score < 4 was considered negative and a 4Ts score ≥ 4 was considered positive

Figure S2: Distribution of minimal depth and its mean (predictor selection)

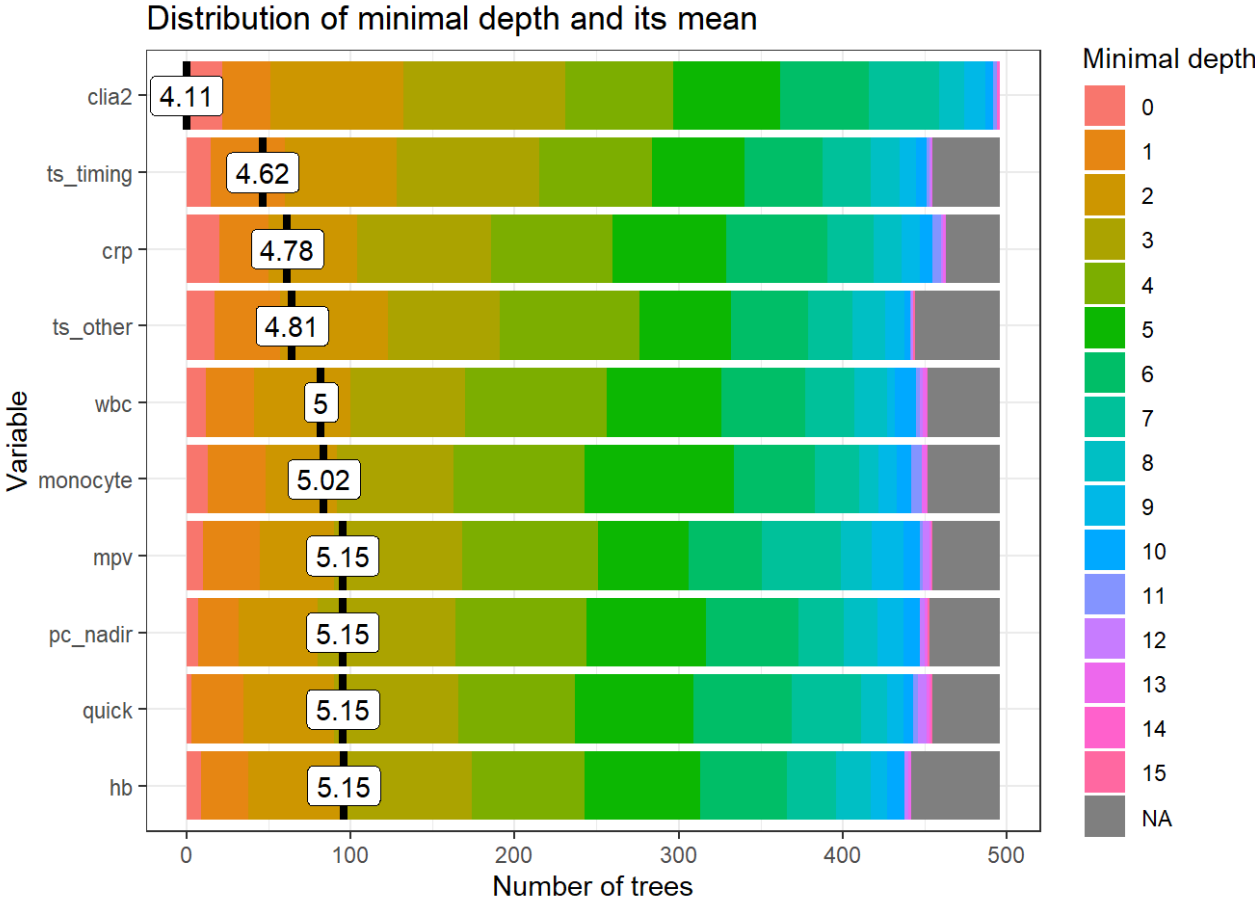



**Figure S3: Multi-way importance plot (Mean depth of first split, number of trees in which the root is split on the variable, total number of nodes in the forest)**

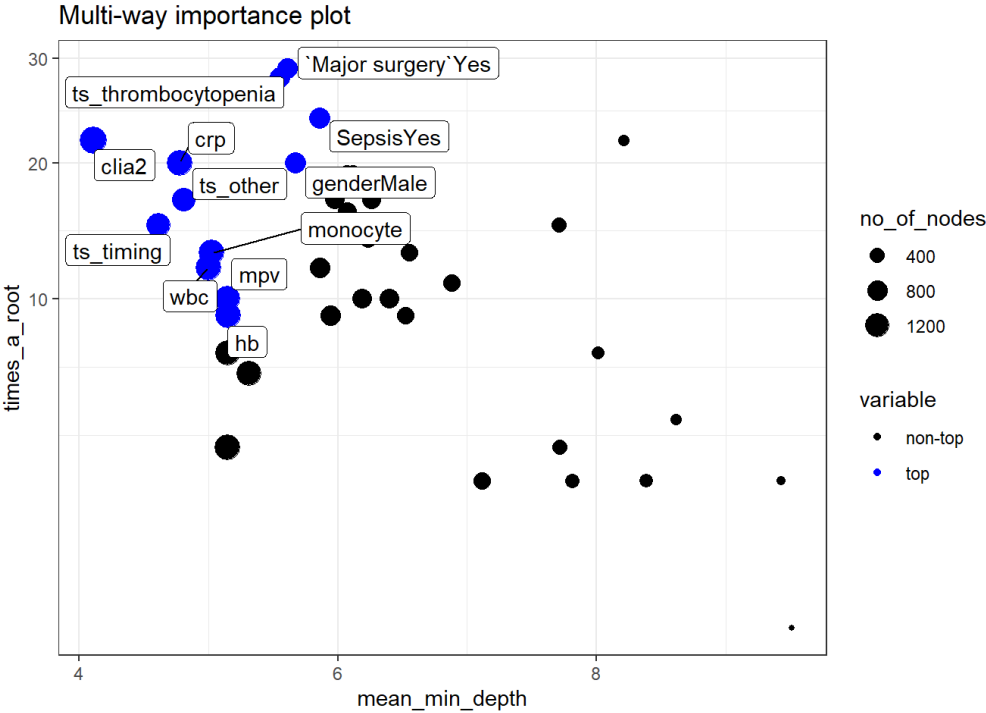

Figure S4: Multi-way importance plot (Accuracy decrease, Gini decrease, p-value)

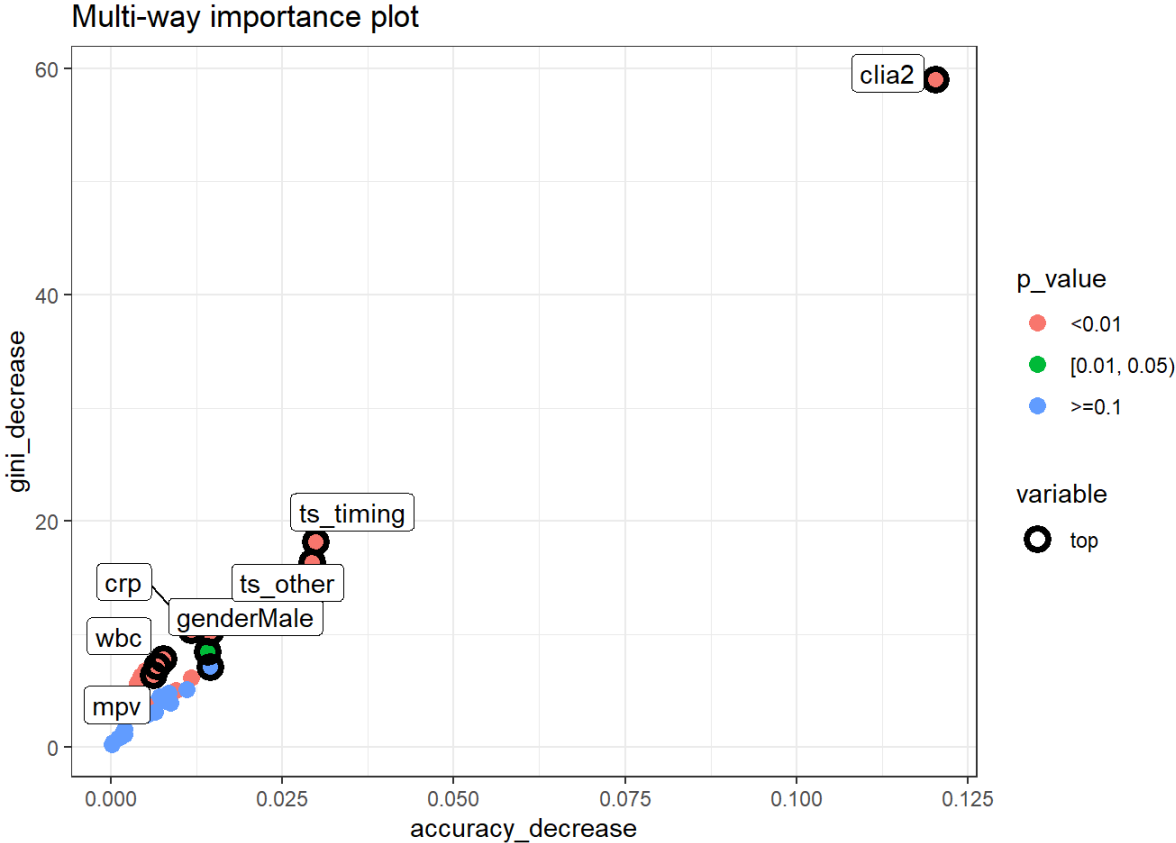

**Table S4: Logarithmic loss scores of the different models**

|                           | CLIA  | PaGIA | ELISA |                  |
|---------------------------|-------|-------|-------|------------------|
| Logarithmic regression    | 0.15  | 0.18  | 0.14  | -                |
| Elastic net               | 1     | 0.8   | 1     | $\alpha$         |
| logarithmic regression    | 0.01  | 0.01  | 0.03  | $\lambda$        |
|                           | 0.15  | 0.17  | 0.15  | Logarithmic loss |
| Gradient boosting machine | 54    | 33    | 100   | No. trees,       |
|                           | 0.075 |       | 0.075 | shrinkage        |
|                           | 3     |       | 1     | interaction      |
|                           | 5     |       | 1     | depth,           |
|                           | 0.15  | 0.16  | 0.14  | Minobsinnode     |
| Random forest             | 3     | 3     | 2     | Logarithmic loss |
|                           | 0.20  | 0.19  | 0.15  | mtry             |
| Support vector machine    | 4     | 10    | 4     | Logarithmic loss |
|                           | 0.001 | 0.01  | 0.01  | Degree           |
|                           | 2.4   | 0.7   | 0.7   | scale            |
|                           | 0.15  | 0.16  | 0.13  | c                |
|                           |       |       |       | Logarithmic loss |

**Table S5: ROC-Curves of the different models**

|                                           | <b>CLIA</b>             | <b>PaGIA</b>            | <b>ELISA</b>            |
|-------------------------------------------|-------------------------|-------------------------|-------------------------|
| <b>Logarithmic regression</b>             | 0.985<br>(0.974, 0.996) | 0.983<br>(0.970, 0.997) | 0.981<br>(0.976, 0.996) |
| <b>Elastic net logarithmic regression</b> | 0.988<br>(0.979, 0.998) | 0.986<br>(0.973, 0.998) | 0.984<br>(0.970, 0.998) |
| <b>Gradient boosting machine</b>          | 0.982<br>(0.970, 0.995) | 0.991<br>(0.982, 0.999) | 0.984<br>(0.973, 0.996) |
| <b>Random forest</b>                      | 0.975<br>(0.960, 0.991) | 0.977<br>(0.962, 0.992) | 0.981<br>(0.967, 0.996) |
| <b>Support vector machine</b>             | 0.989<br>(0.980, 0.998) | 0.988<br>(0.977, 0.998) | 0.985<br>(0.974, 0.996) |

**Table S6: Sensitivity analysis based on 250 trainings and validation splits**

|                                 | Min. AUC | Max. AUC | Median AUC | Mean AUC | SD AUC |
|---------------------------------|----------|----------|------------|----------|--------|
| <b>CLIA algorithms</b>          |          |          |            |          |        |
| Logistic regression             | 0.939    | 0.997    | 0.984      | 0.980    | 0.011  |
| Elastic net logistic regression | 0.936    | 0.996    | 0.984      | 0.980    | 0.012  |
| Gradient boosting machine       | 0.923    | 0.996    | 0.984      | 0.979    | 0.013  |
| Random forest                   | 0.916    | 0.998    | 0.983      | 0.979    | 0.012  |
| Support vector machine          | 0.942    | 0.996    | 0.984      | 0.980    | 0.011  |
| <b>PaGIA algorithms</b>         |          |          |            |          |        |
| Logistic regression             | 0.923    | 0.996    | 0.980      | 0.978    | 0.012  |
| Elastic net logistic regression | 0.934    | 0.997    | 0.981      | 0.978    | 0.012  |
| Gradient boosting machine       | 0.920    | 0.998    | 0.981      | 0.977    | 0.012  |
| Random forest                   | 0.894    | 0.993    | 0.978      | 0.973    | 0.016  |
| Support vector machine          | 0.931    | 0.995    | 0.980      | 0.977    | 0.012  |
| <b>ELISA algorithms</b>         |          |          |            |          |        |
| Logistic regression             | 0.951    | 0.996    | 0.986      | 0.983    | 0.007  |
| Elastic net logistic regression | 0.942    | 0.996    | 0.983      | 0.979    | 0.012  |
| Gradient boosting machine       | 0.964    | 0.996    | 0.987      | 0.985    | 0.007  |
| Random forest                   | 0.953    | 0.995    | 0.985      | 0.983    | 0.007  |
| Support vector machine          | 0.954    | 0.997    | 0.987      | 0.984    | 0.009  |

**Table S7: Intercept and coefficients of the logistic regression models**

|                                                | <b>Input type</b> | <b>CLIA</b> | <b>PaGIA</b> | <b>ELISA</b> |
|------------------------------------------------|-------------------|-------------|--------------|--------------|
| <b>Intercept</b>                               | -                 | 0.3269      | -0.04331     | -0.3865      |
| <b>Platelet nadir [10<sup>9</sup>/L]</b>       | Numeric           | -0.5630     | -0.57171     | -0.4413      |
| <b>UFH exposure</b>                            | Categorical       | 0.9042      | 0.30374      | 0.8736       |
| <b>CRP [mg/L]</b>                              | Numeric           | -0.3665     | -0.11689     | -0.2231      |
| <b>4 Ts – Timing of thrombocytopenia</b>       | Numeric           | 0.9845      | 1.12405      | 1.1296       |
| <b>4 Ts – Other causes of thrombocytopenia</b> | Numeric           | 0.5148      | 0.37429      | 0.9332       |
| <b>Immunoassay test result</b>                 | Numeric           | 4.2541      | 3.83829      | 4.3217       |
| <b>Cut-off</b>                                 | -                 | 0.39        | 0.42         | 0.42         |

**Table S8: Diagnostic accuracy of a multivariable diagnostic prediction model for HIT as determined in the full cohort**

|                                   | N    | TP  | FN | TN   | FP  | SENSITIVITY<br>(95% CI) | SPECIFICITY<br>(95% CI) | PPV            | NPV              | LR+                     | LR-                  |
|-----------------------------------|------|-----|----|------|-----|-------------------------|-------------------------|----------------|------------------|-------------------------|----------------------|
| <b>TORADI-HIT ALGORITHM</b>       |      |     |    |      |     |                         |                         |                |                  |                         |                      |
| <b>CLIA</b>                       | 1318 | 106 | 5  | 1144 | 63  | 95<br>(90, 99)          | 95<br>(93, 96)          | 63<br>(55, 70) | 100<br>(99, 100) | 18.30<br>(14.34, 23.35) | 0.05<br>(0.02, 0.11) |
| <b>PAGIA</b>                      | 1273 | 96  | 3  | 1111 | 63  | 97<br>(91, 99)          | 95<br>(93, 96)          | 60<br>(52, 68) | 100<br>(99, 100) | 18.07<br>(12.01, 32.20) | 0.03<br>(0.01, 0.10) |
| <b>ELISA</b>                      | 1378 | 110 | 6  | 1201 | 61  | 95<br>(89, 98)          | 95<br>(94, 96)          | 64<br>(57, 71) | 100<br>(99, 100) | 19.62<br>(15.30, 25.15) | 0.05<br>(0.02, 0.14) |
| <b>CURRENT CLINICAL ALGORITHM</b> |      |     |    |      |     |                         |                         |                |                  |                         |                      |
| <b>CLIA</b>                       | 1318 | 97  | 14 | 1157 | 50  | 87<br>(80, 93)          | 96<br>(95, 97)          | 66<br>(58, 74) | 99<br>(98, 99)   | 21.10<br>(15.94, 27.92) | 0.13<br>(0.08, 0.21) |
| <b>PAGIA</b>                      | 1273 | 90  | 9  | 974  | 200 | 91<br>(83, 96)          | 83<br>(81, 85)          | 31<br>(26, 37) | 99<br>(98, 100)  | 5.34<br>(4.64, 6.14)    | 0.11<br>(0.06, 0.20) |
| <b>ELISA</b>                      | 1378 | 104 | 12 | 1175 | 87  | 90<br>(83, 95)          | 93<br>(92, 94)          | 54<br>(47, 62) | 99<br>(98, 99)   | 13.01<br>(10.52, 16.08) | 0.11<br>(0.07, 0.19) |

**Table S9: Statistical test between the TORADI-HIT model and the currently recommended clinical algorithm according to the method of Roldán-Nofuentes**

|              | SENSITIVITY |                                      |                     |         | SPECIFICITY       |                                      |                     |         | GLOBAL  |
|--------------|-------------|--------------------------------------|---------------------|---------|-------------------|--------------------------------------|---------------------|---------|---------|
|              | FAVORS      | 95 % CI FOR A SENSITIVITY DIFFERENCE | WALD TEST STATISTIC | P-VALUE | FAVORS            | 95 % CI FOR A SPECIFICITY DIFFERENCE | WALD TEST STATISTIC | P-VALUE | P-VALUE |
|              |             | [%]                                  |                     |         |                   | [%]                                  |                     |         |         |
| <b>CLIA</b>  | TORADI-HIT  | 1.20, 12.83                          | 6.788               | < 0.01  | CURRENT ALGORITHM | 0.335, 1.816                         | 8.961               | <0.01   | < 0.01  |
| <b>PAGIA</b> | TORADI-HIT  | -0.68, 12.56                         | 3.736               | < 0.01  | TORADI-HIT        | 9.54, 13.77                          | 118.035             | < 0.01  | < 0.01  |
| <b>ELISA</b> | TORADI-HIT  | -0.09, 10.26                         | 4.682               | < 0.01  | TORADI-HIT        | 0.841, 3.273                         | 11.368              | < 0.01  | < 0.01  |



**Table S10: Codebook**

| Name                                      | Data type | Labels                                                                                                                                                                                                                                                                                        |  |
|-------------------------------------------|-----------|-----------------------------------------------------------------------------------------------------------------------------------------------------------------------------------------------------------------------------------------------------------------------------------------------|--|
| pid                                       | numeric   |                                                                                                                                                                                                                                                                                               |  |
| gender                                    | factor    | 1. Female,2. Male                                                                                                                                                                                                                                                                             |  |
| institution                               | factor    | 1. Inselspital Bern,2. University hospital Zuerich,3. University hospital Basel,4. Canton hospital Aarau,5. Canton hospital Luzerne,6. Canton hospital St. Gallen,7. EOC,8. University hospital Tuebingen,9. University hospital Greifswald,10. City hospital Triemli Zuerich 11. Mayo Clinic |  |
| setting                                   | factor    | 1. Postoperative_general_surgery_and_orthopedics,2. Postoperative_cardiac_and_vascular_surgery,3. Internal_medicine,4. ICU,5. Major_Trauma,6. Other                                                                                                                                           |  |
| observer                                  | factor    | 1. Treating physician,2. Consultancy team,3. Treating physician + Consultancy,4. Laboratory specialist,5. Pharmacist,6. Other                                                                                                                                                                 |  |
| tool_clinical                             | factor    | 1. 4T Score,2. Other,3. Clinical risk was not assessed                                                                                                                                                                                                                                        |  |
| ts_thrombocytopenia                       | numeric   | 0,1,2                                                                                                                                                                                                                                                                                         |  |
| ts_timing                                 | numeric   | 0,1,2                                                                                                                                                                                                                                                                                         |  |
| ts_thrombosis                             | numeric   | 0,1,2                                                                                                                                                                                                                                                                                         |  |
| type_thrombosis                           | factor    | 1. DVT,2. PE,3. Other VTE,4. MI,5. Stroke,6. Other ATE,7. Skin necross                                                                                                                                                                                                                        |  |
| ts_other                                  | numeric   | 0, 1, 2                                                                                                                                                                                                                                                                                       |  |
| Chronic thrombocytopenic disorder         | factor    | 1. No,2. Yes                                                                                                                                                                                                                                                                                  |  |
| Treatment known to cause thrombocytopenia | factor    | 1. No,2. Yes                                                                                                                                                                                                                                                                                  |  |
| Sepsis                                    | factor    | 1. No,2. Yes                                                                                                                                                                                                                                                                                  |  |
| Severe DIC                                | factor    | 1. No,2. Yes                                                                                                                                                                                                                                                                                  |  |
| IA Device                                 | factor    | 1. No,2. Yes                                                                                                                                                                                                                                                                                  |  |
| Chemotherapy                              | factor    | 1. No,2. Yes                                                                                                                                                                                                                                                                                  |  |
| Major surgery                             | factor    | 1. No,2. Yes                                                                                                                                                                                                                                                                                  |  |
| Multiple causes                           | factor    | 1. No,2. Yes                                                                                                                                                                                                                                                                                  |  |
| Other causes                              | factor    | 1. No,2. Yes                                                                                                                                                                                                                                                                                  |  |
| bleeding                                  | factor    | 1. No,2. Yes                                                                                                                                                                                                                                                                                  |  |
| cancer                                    | factor    | 1. No,2. Yes                                                                                                                                                                                                                                                                                  |  |
| covid19                                   | factor    | 1. No,2. Yes                                                                                                                                                                                                                                                                                  |  |
| UFH                                       | factor    | 1. No,2. Yes                                                                                                                                                                                                                                                                                  |  |
| LMWH                                      | factor    | 1. No,2. Yes                                                                                                                                                                                                                                                                                  |  |
| Fondaparinux                              | factor    | 1. No,2. Yes                                                                                                                                                                                                                                                                                  |  |
| Vit K Antagonist                          | factor    | 1. No,2. Yes                                                                                                                                                                                                                                                                                  |  |
| DOAC                                      | factor    | 1. No,2. Yes                                                                                                                                                                                                                                                                                  |  |
| Dabigatran                                | factor    | 1. No,2. Yes                                                                                                                                                                                                                                                                                  |  |
| dosage_clinical                           | factor    | 1. Prophylactic or intermediate dosage,2. Therapeutic dosage,3. Multiple dosages,4. Unclear                                                                                                                                                                                                   |  |
| heparin_4weeks                            | factor    | 1. No,2. Yes                                                                                                                                                                                                                                                                                  |  |
| ticagrelor                                | factor    | 1. No,2. Yes                                                                                                                                                                                                                                                                                  |  |
| hb                                        | numeric   |                                                                                                                                                                                                                                                                                               |  |
| wbc                                       | numeric   |                                                                                                                                                                                                                                                                                               |  |

**Supplementary material – Diagnostic prediction model for HIT. Nilius et al.**

|              |         |                         |  |
|--------------|---------|-------------------------|--|
| monocyte     | numeric |                         |  |
| pc           | numeric |                         |  |
| mpv          | numeric |                         |  |
| pc_peak      | numeric |                         |  |
| pc_nadir     | numeric |                         |  |
| days         | numeric |                         |  |
| d_dimers     | numeric |                         |  |
| fibrinogen   | numeric |                         |  |
| pt           | numeric |                         |  |
| quick        | numeric |                         |  |
| crp          | numeric |                         |  |
| albumin      | numeric |                         |  |
| elisa_igg    | numeric |                         |  |
| pagja        | numeric |                         |  |
| clia2        | numeric |                         |  |
| hipa         | factor  | 1. Negative,2. Positive |  |
| age          | numeric |                         |  |
| dvt          | factor  | 1. No,2. Yes            |  |
| PE           | factor  | 1. No,2. Yes            |  |
| skinnecrosis | factor  | 1. No,2. Yes            |  |
